# Supplementary material for: A novel identification method for stratospheric gravity waves in nadir viewing satellite observations
Source: Copernicus journal article supplement (doi:10.5194/acp-25-17595-2025), 2025-12-04
Supplement: Supplementary file 1 [file acp-25-17595-2025-supplement.pdf]

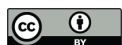

*Supplement of*

## **A novel identification method for stratospheric gravity waves in nadir viewing satellite observations**

**Peter G. Berthelemy et al.**

*Correspondence to:* Peter G. Berthelemy (pb948@bath.ac.uk)

The copyright of individual parts of the supplement might differ from the article licence.

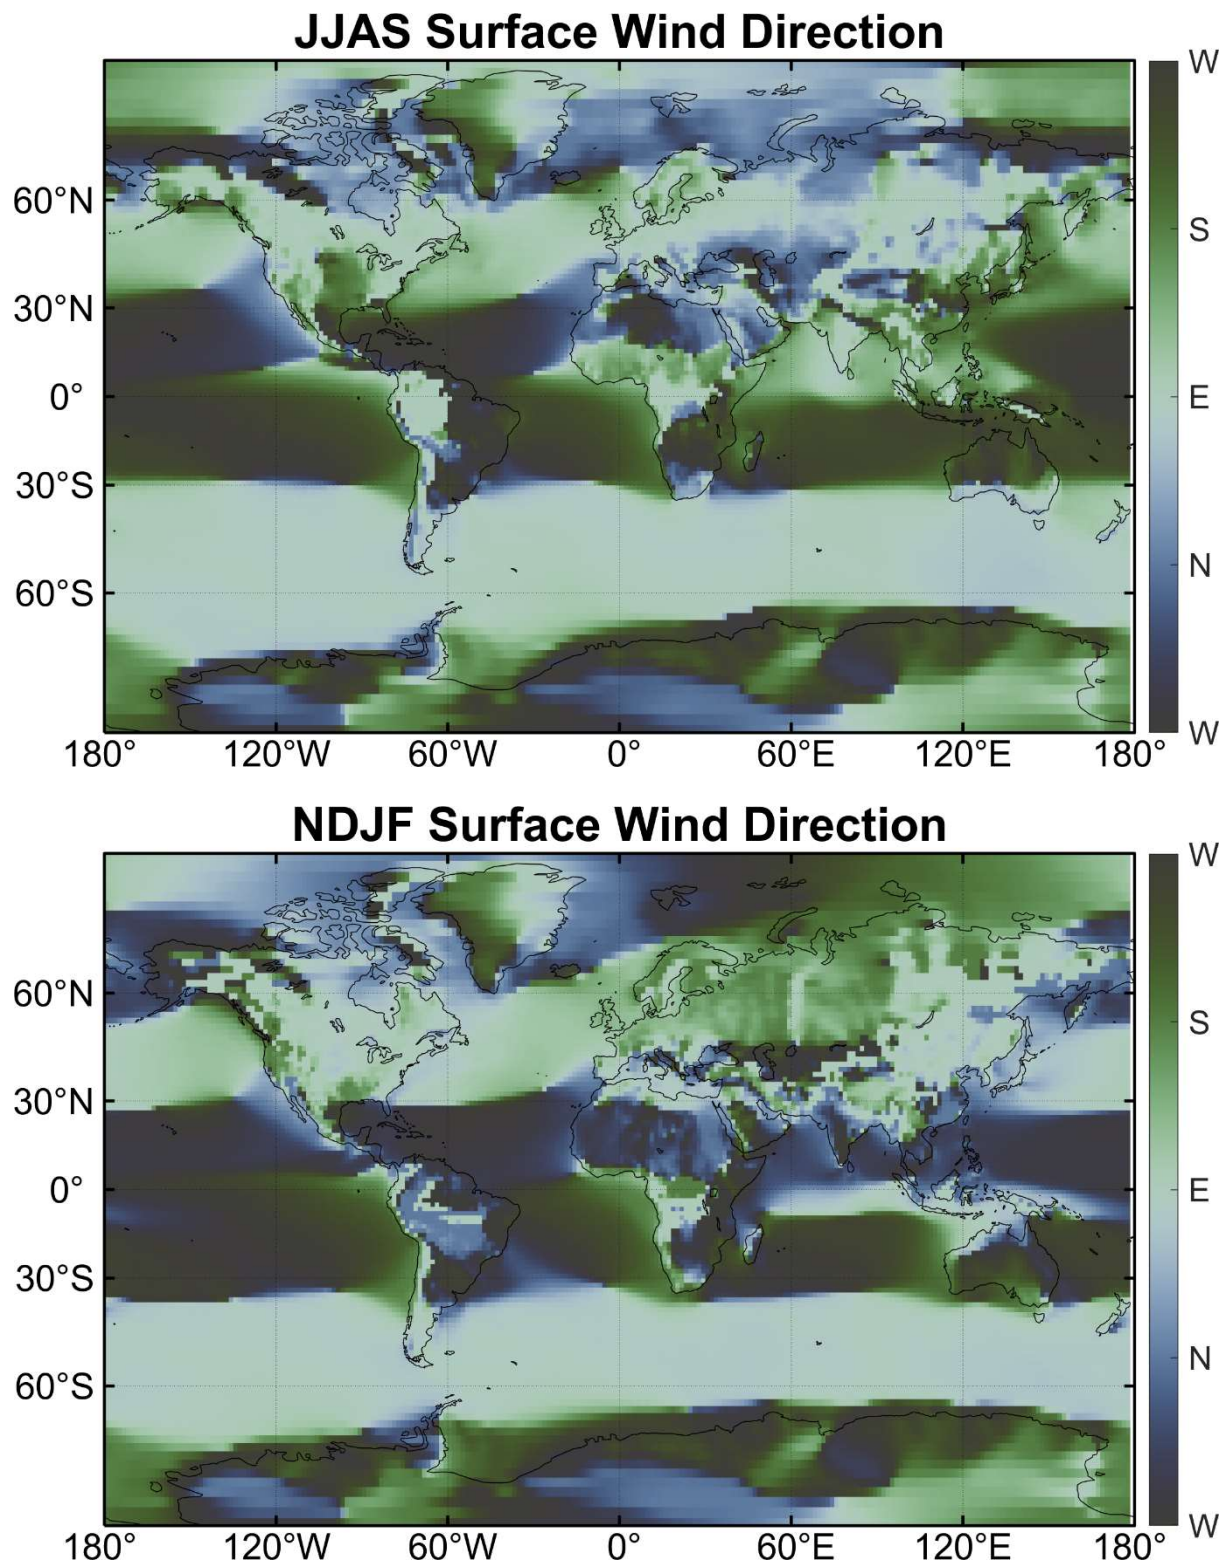

**Figure S1.** Average surface wind direction from ERA5 climatological reanalyses. The top panel has the average direction from June – September, and the bottom has the average direction from November – February.
